# Supplementary material
Source: publisher figshare collection journal article supplement (https://acs.figshare.com/ndownloader/files/4189057)

### FIGURE 3

**Figure 3.** Calibration curve of the assay.

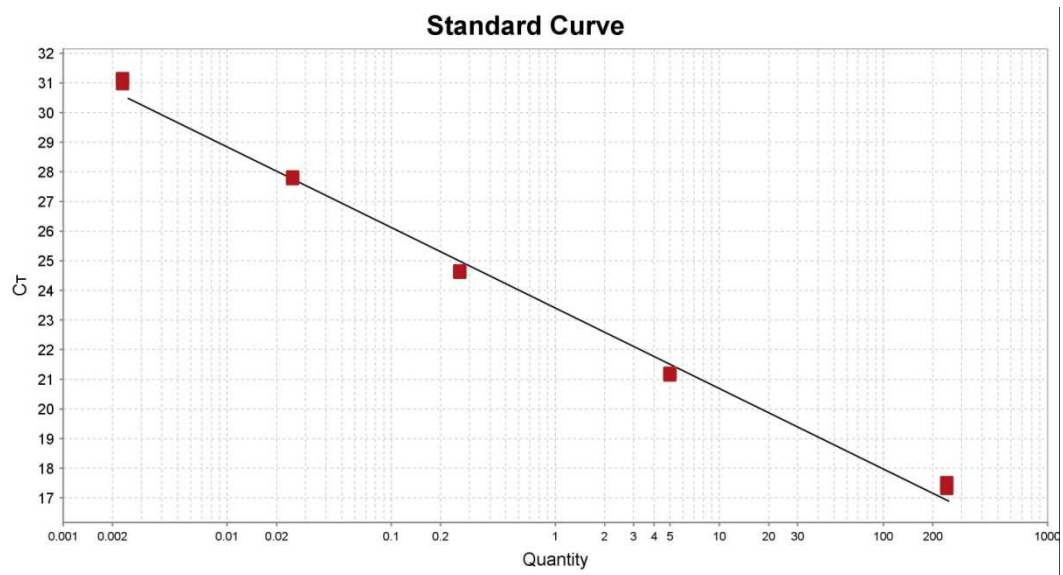

Supplement: Supplementary file 1 [file 4189057]
